# Supplementary material
Source: PubMed Central journal article supplement (PMC2650140)
Supplement: 0808075106_0808075106SI.pdf [file 0808075106_0808075106SI.pdf]

# Supporting Information

Petrusek *et al.* 10.1073/pnas.0808075106

Table S1. Origin of individuals belonging to the *D. atkinsoni* complex and the two outgroup species, and GenBank accession numbers of sequences used for phylogenetic reconstruction.

| Species                             | Country/Region | Locality                                                     | Crown | COI acc. no. | 12S acc. no. |
|-------------------------------------|----------------|--------------------------------------------------------------|-------|--------------|--------------|
| <i>D. gr. atkinsoni</i> - lineage 1 | Belgium        | Damme - pool                                                 | no    | DQ166847     | DQ116601     |
| <i>D. gr. atkinsoni</i> - lineage 1 | Israel         | Tel Ashdod - flooded meadow                                  | yes   |              | DQ116600     |
| <i>D. gr. atkinsoni</i> - lineage 1 | Israel         | Netanya - rainpool Dora                                      | no    |              | FJ415607     |
| <i>D. gr. atkinsoni</i> - lineage 1 | Spain          | Doñana National Park - Lucio de Membrillo lagoon             | no    | DQ166848     | DQ116602     |
| <i>D. gr. atkinsoni</i> - lineage 1 | Spain          | El Rocío - flooded meadow                                    | yes   |              | DQ116599     |
| <i>D. gr. atkinsoni</i> - lineage 2 | Golan Heights  | Merom Golan - Bental Reservoir                               | no    | DQ166845     | DQ116596     |
| <i>D. gr. atkinsoni</i> - lineage 2 | Golan Heights  | crater lake Birkat Ram                                       | no    |              | DQ116597     |
| <i>D. atkinsoni</i> s.s. (lin. 3)   | Hungary        | Hajdúböszörmény - puddles                                    | no    |              | DQ116593     |
| <i>D. atkinsoni</i> s.s. (lin. 3)   | Hungary        | Sarud - temporary pool                                       | yes   |              | DQ116594     |
| <i>D. atkinsoni</i> s.s. (lin. 3)   | Israel         | Atlit - ditches                                              | no    | DQ166843     | DQ116590     |
| <i>D. atkinsoni</i> s.s. (lin. 3)   | Israel         | Khadera - rainpool Samar                                     | yes   |              | DQ116595     |
| <i>D. atkinsoni</i> s.s. (lin. 3)   | Israel         | Kholon - rainpool "Reserve"                                  | no    | DQ166844     | DQ116591     |
| <i>D. atkinsoni</i> s.s. (lin. 3)   | Spain          | Doñana National Park - Lucio de Membrillo lagoon             | no    |              | DQ116592     |
| <i>D. gr. atkinsoni</i> - lineage 4 | Hungary        | Kiskunság National Park - Orgovány - rainpool<br>Czárda Szék | no    | DQ166846     | DQ116598     |
| <i>D. magna</i>                     | Israel         | Netanya - rainpool Dora                                      | N/A   | DQ166849     | DQ116603     |
| <i>D. similis</i>                   | Spain          | Doñana National Park - Membrillo Observatorio                | N/A   | DQ166842     | DQ116589     |

Presence or absence of the "crown of thorns" in sampled populations of the *D. atkinsoni* complex is indicated for each locality.
